# Supplementary material for: BioPen: direct writing of functional materials at the point of care
Source: PubMed Central journal article supplement — Sci Rep. 2014 May 6;4:4872. doi: 10.1038/srep04872 (PMC4010928; doi:10.1038/srep04872), 2014-05-06
Supplement: srep04872-s1.pdf [file srep04872-s1.pdf]

## Supplementary material

### **BioPen: direct writing of functional materials at the point of care**

Yu Long Han<sup>a,b,\*</sup>, Jie Hu<sup>a,b,\*</sup>, Guy M. Genin<sup>c,d</sup>, Tian Jian Lu<sup>b,#</sup>, Feng Xu<sup>a,b,#</sup>

<sup>a</sup> *The Key Laboratory of Biomedical Information Engineering of the Ministry of Education, School of Life Science and Technology, Xi'an Jiaotong University, Xi'an 710049, China*

<sup>b</sup> *Bioinspired Engineering and Biomechanics Center (BEBC), Xi'an Jiaotong University, Xi'an 710049, China*

<sup>c</sup> *Department of Neurological Surgery, School of Medicine, Washington University in St. Louis, St. Louis 63130, MO, USA*

<sup>d</sup> *Department of Mechanical Engineering & Materials Science, Washington University in St. Louis, St. Louis 63130, MO, USA*

*\* These authors contributed equally to this work.*

<sup>#</sup> *Corresponding authors: [tjlu@mail.xjtu.edu.cn](mailto:tjlu@mail.xjtu.edu.cn), [fengxu@mail.xjtu.edu.cn](mailto:fengxu@mail.xjtu.edu.cn)*

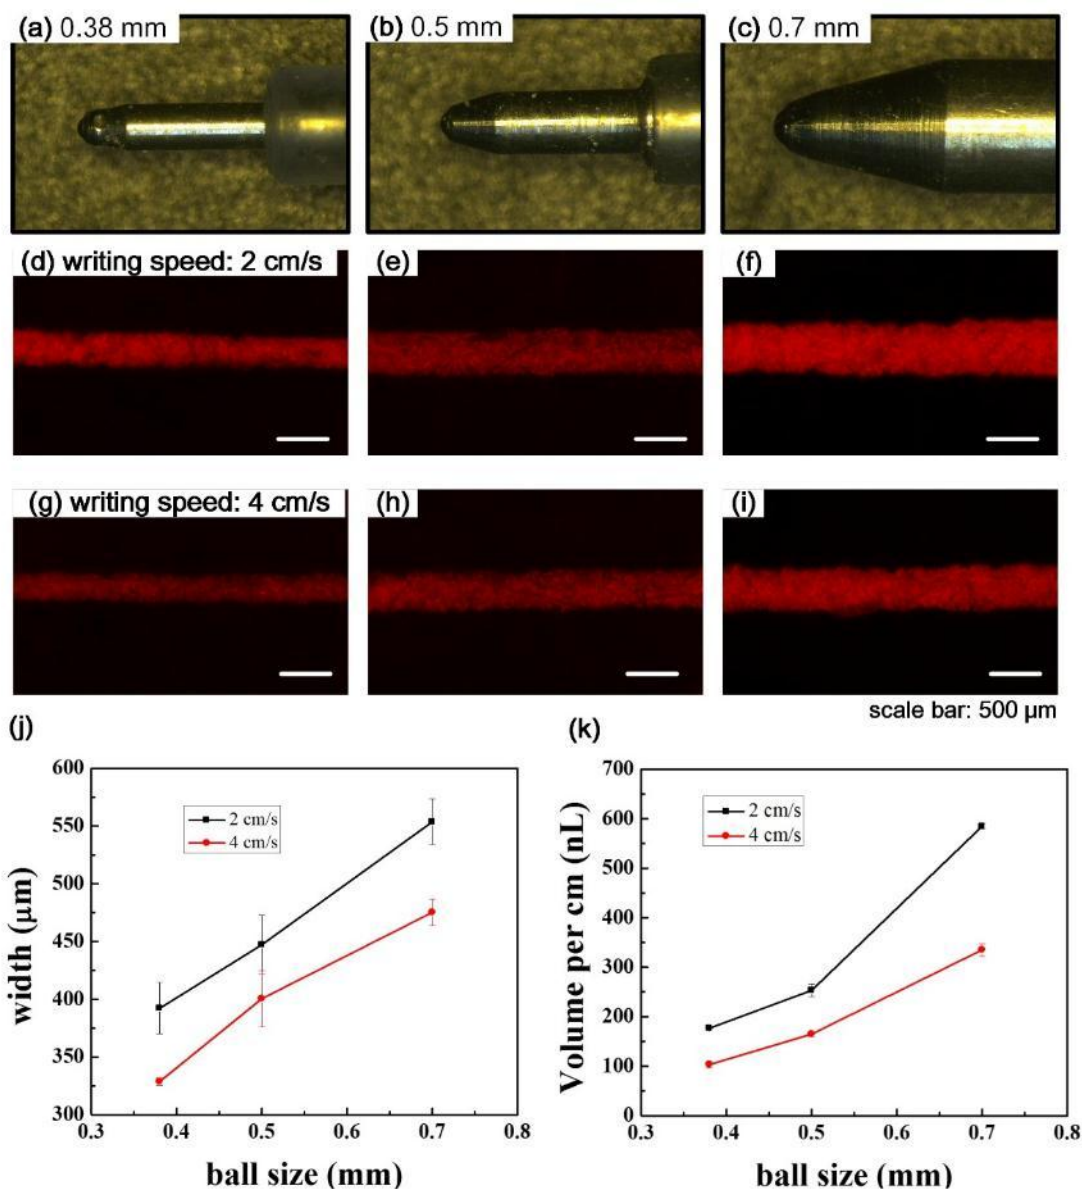

**Figure S1. Line width and volume deposited per unit line length could be controlled through the choice of steel ball diameter (a-c) and writing speed. This was assessed by measuring rhodamine lines on printer paper that were written with differently sized steel balls and at different writing speeds (d-i). Line width (j) and volume deposited per unit line length (k) increased with both the diameter of the steel ball and decreased with the speed of writing.**

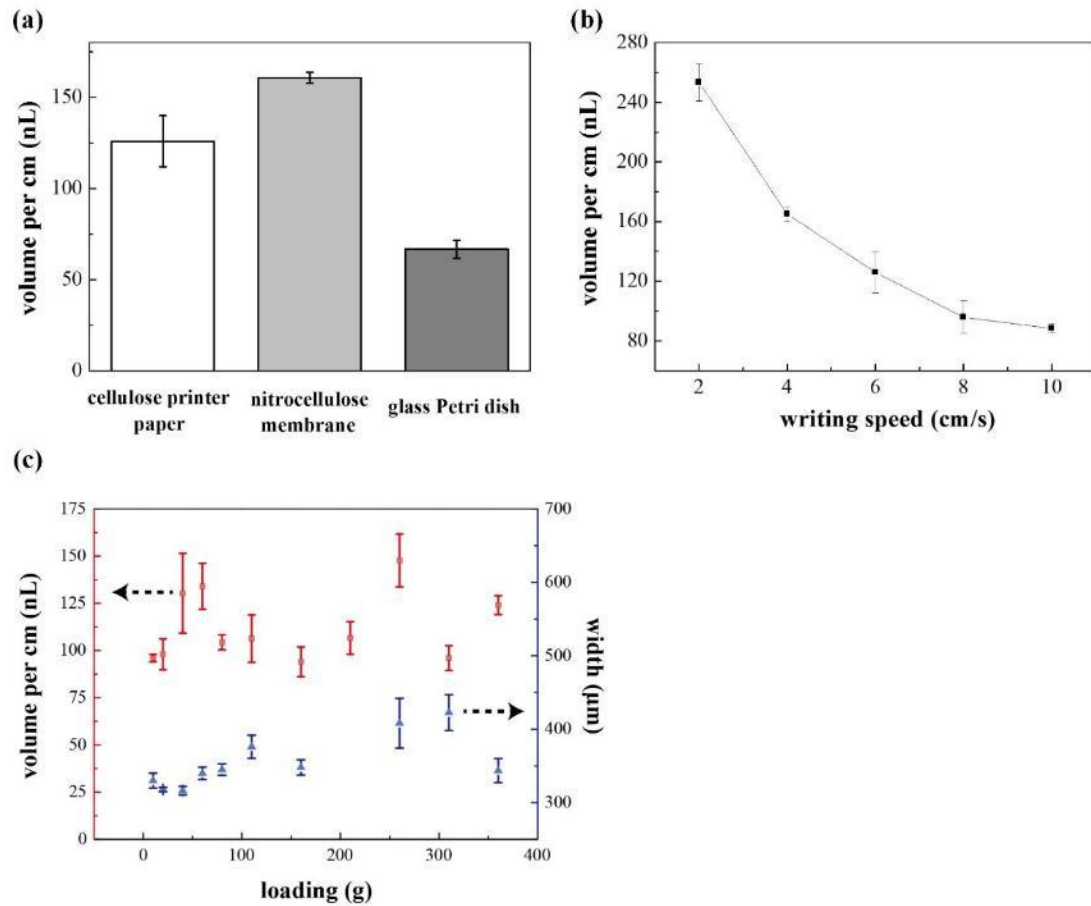

**Figure S2. The volume of functional biomaterial “ink” deposited per centimeter of line length varied with (a) the substrate, (b) the writing speed and (c) pressure. Results shown in (a) are for rhodamine “ink” written at 6 cm/s using a 500  $\mu\text{m}$  diameter steel ball. Results shown in (b) are for this same ink and pen, written at a range of speeds. Results shown in (c) are for this same ink, speed and pen, written at a range of pressure.**

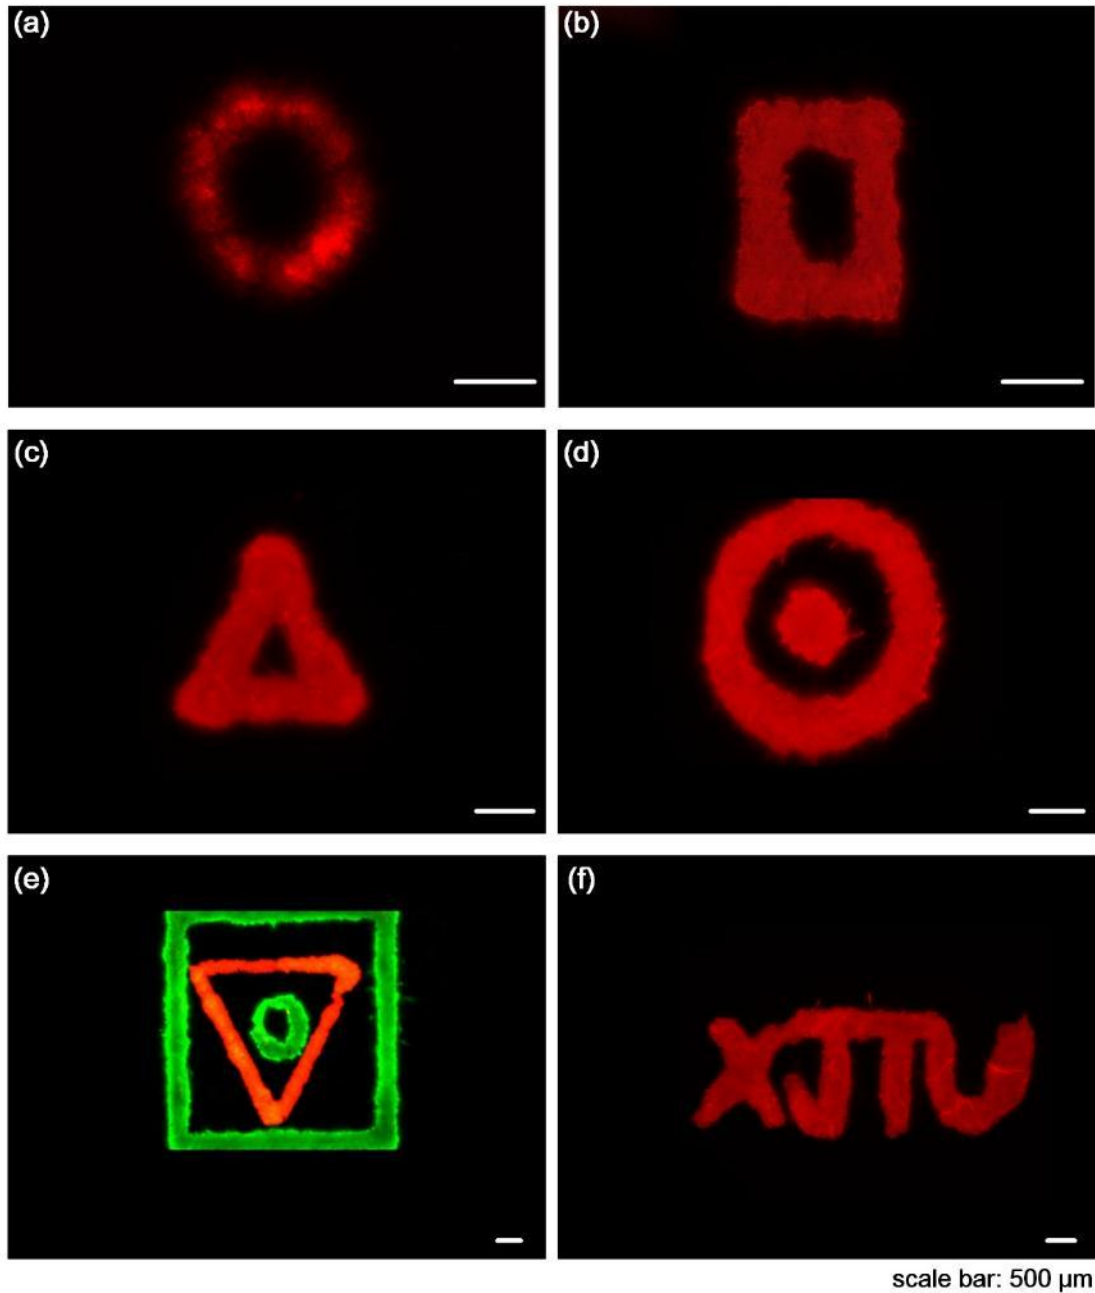

**Figure S3. BioPen shows the ability to write functional “inks” with the same degree of user-dependent accuracy as conventional inks.** This was demonstrated by writing rhodamine (red) and FITC (green) onto a cellulose printer paper in single-step patterning of simple shapes (a-c) , two-step patterning of a point in circle (d), three-step patterning of a circle, triangle, and square (e), and seven-step patterning of the initials “XJTU” (f).

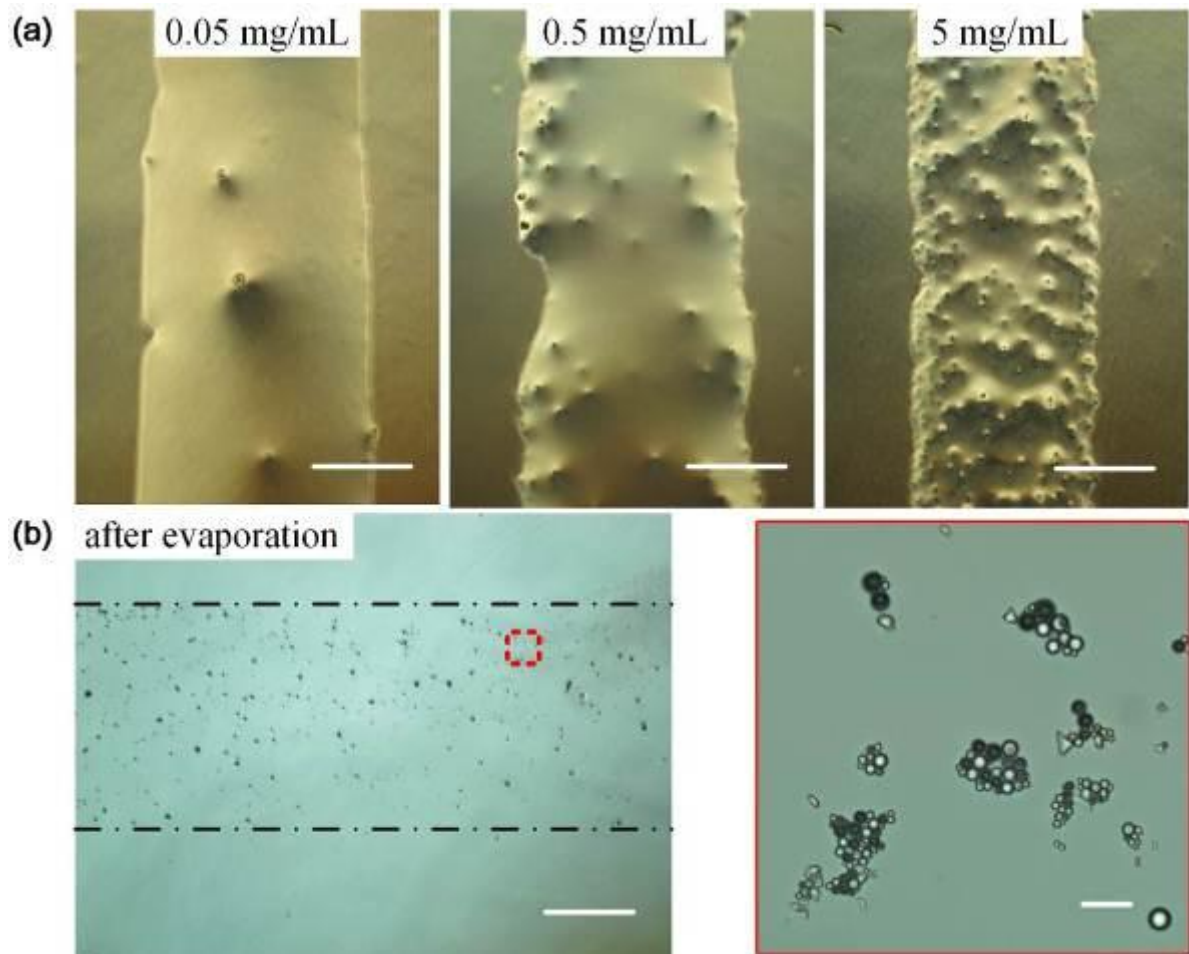

**Figure S4. Glass beads can be dispersed in relatively small clusters using BioPen.**

(a) Phase-contrast micrographs of 9-13  $\mu\text{m}$  diameter glass beads written with different concentrations on glass Petri dishes. Scale bar: 500  $\mu\text{m}$ . (b) Phase-contrast micrographs of glass beads after evaporation. The dashed line indicates the boundary of liquid. Scale bar: 500  $\mu\text{m}$ . Note that clustering occurred during evaporation, as seen in the enlargement at right of a region within the red dashed frame in left photo (scale bar: 20  $\mu\text{m}$ ).

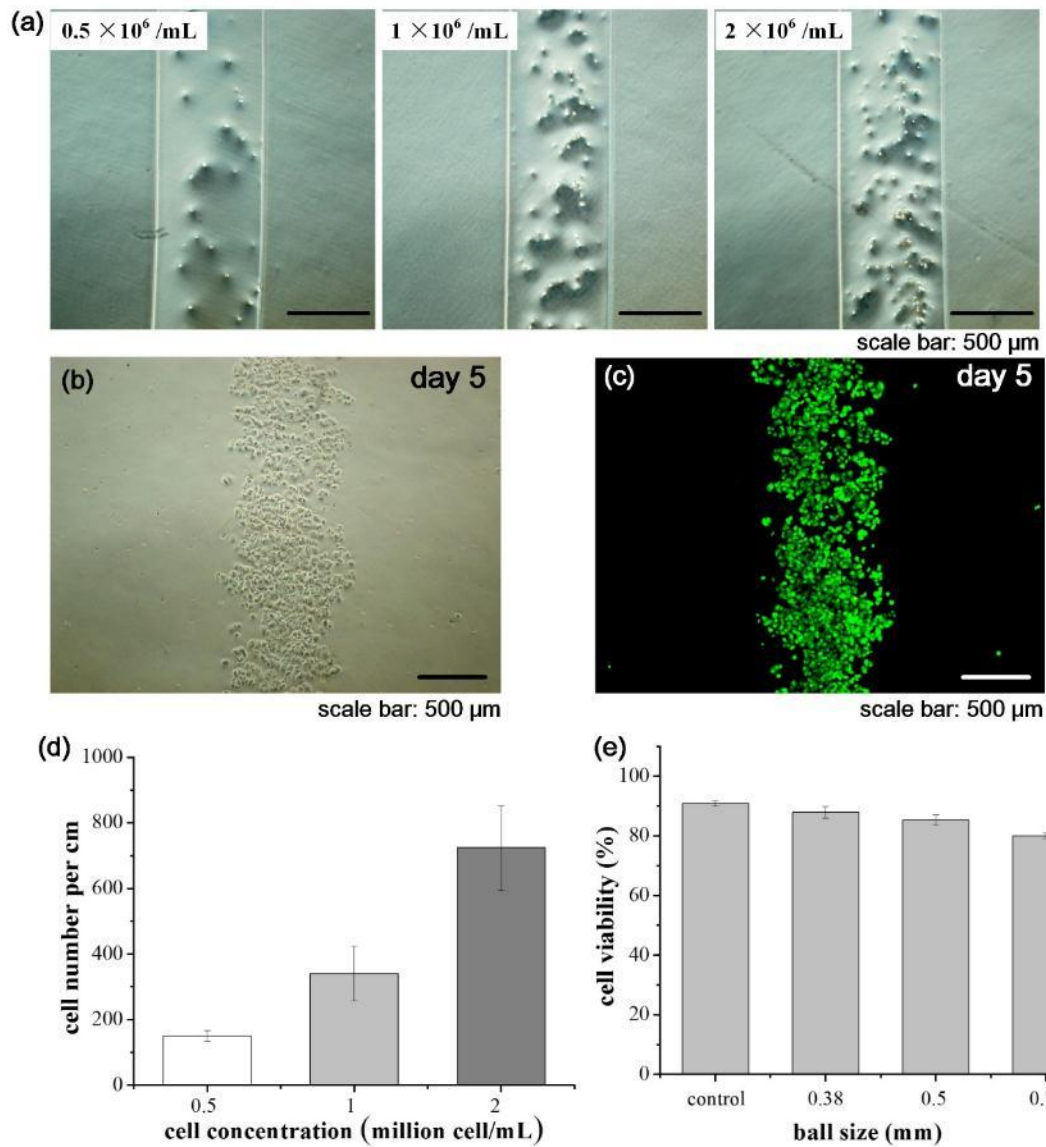

**Figure S5. BioPen can pattern cells accurately with only a minor reduction in cell viability.** (a) Phase-contrast micrographs of MCF-7 malignant cells written with different cell concentrations on Petri dishes. Phase-contrast micrographs (b) of MCF-7 cells after 5 days of culture show a well spread population, and corresponding live/dead staining showed high cell viability (c). (d) The number of cells written per centimeter varied approximately linearly with the concentration of cells in the “ink.” (e) Cell viability after writing decreased slightly relative to control (non-written cells). This decrease was a function of the diameter of the steel ball.

**Table S1. Oligonucleotide sequences used for point-of-care diagnostics.**

| Name                 | Sequence                                                            |
|----------------------|---------------------------------------------------------------------|
| Detector probe       | 5'-CACAAACAGACGGGCACACACTACT-(CH <sub>2</sub> ) <sub>6</sub> -HS-3' |
| Capture probe        | 5'-Biotin/GTCTGAGGGATCTCTAGTTACCAG-3'                               |
| Control probe        | 5'-AGTAGTGTGTGCCCCGTCTGTTGTG/Biotin-3'                              |
| Target nucleic acid  | 5'-AGTAGTGTGTGCCCCGTCTGTTGTGTGACTCTGGTAACTAG<br>AGATCCCTCAGAC-3'    |
| Control nucleic acid | 5'-GCCTCAATAAAGCTTGCCTTGAGTGCTTGTGGAAAATCTC<br>TAGCAGTGGCGCC-3'     |
